# Supplementary material for: Resistance of glioma cells to nutrient-deprived microenvironment can be enhanced by CD133-mediated autophagy
Source: PubMed Central journal article supplement (PMC5342810; doi:10.18632/oncotarget.12803), 2016-10-21
Supplement: oncotarget-07-76238-s001.pdf [file oncotarget-07-76238-s001.pdf]

## Resistance of glioma cells to nutrient-deprived microenvironment can be enhanced by CD133-mediated autophagy

### SUPPLEMENTARY FIGURES AND TABLE

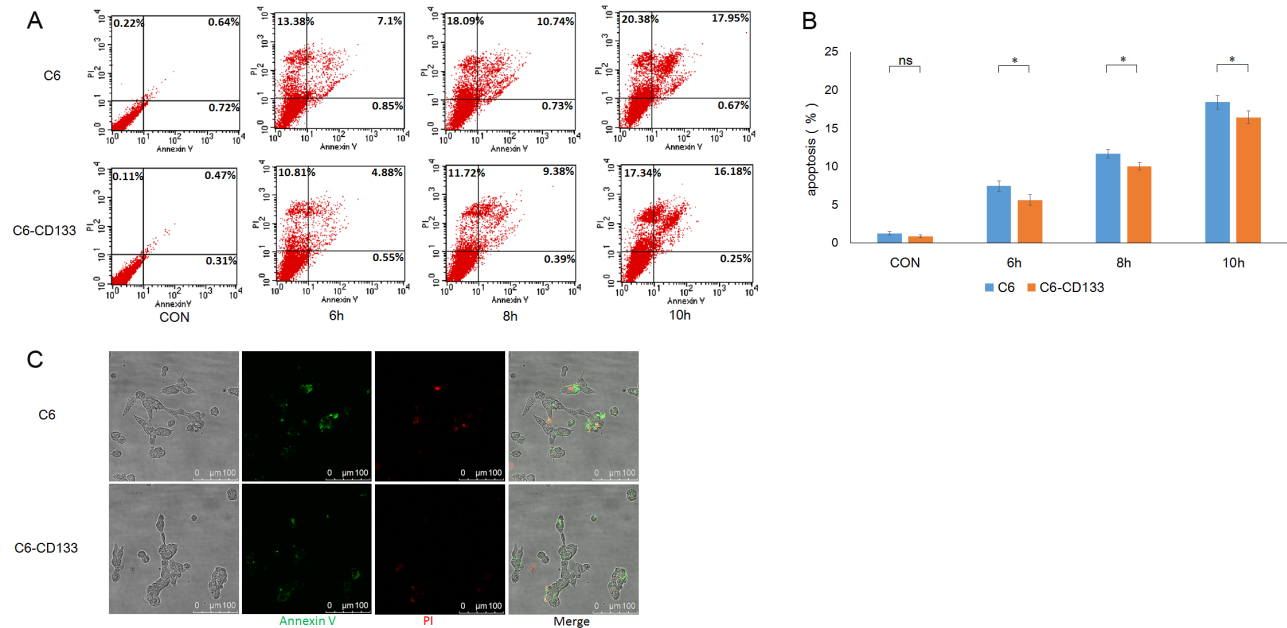

**Supplementary Figure S1:** **A.** C6 and C6-CD133 cells were treated with EBSS for 6, 8 and 10h to determine the apoptosis and necrosis. The percentage of apoptosis and necrosis was analyzed by Annexin V-FITC/PI double staining via flow cytometry after the designated treatments. **B.** Percentage of Annexin V positive cells was quantified. \* $P < 0.05$ . **C.** The percentage of apoptosis and necrosis was evaluated by Annexin V-FITC/PI double staining via immunofluorescence microscopy after C6/C6-CD133 cells exposed to EBSS for 10h.

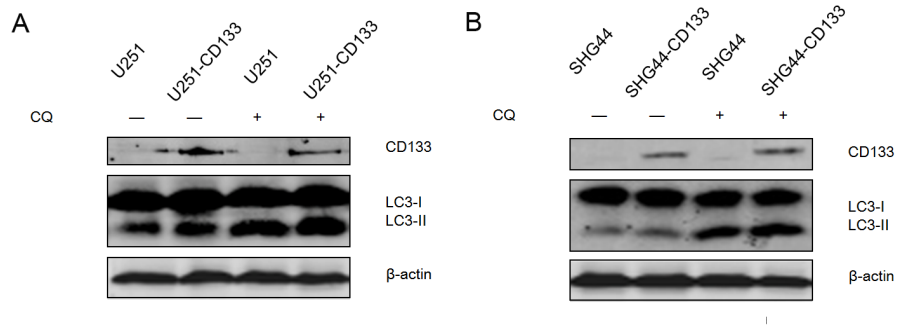

**Supplementary Figure S2: A, B.** Levels of LC3-II in these indicated cell lines were evaluated by Western blot after incubating in EBSS for 4h with or without 50uM CQ.

Supplementary Table S1: Primers used for PCR

| Gene  | Forward / Reverse primer | Primer Sequence (5'-3')  |
|-------|--------------------------|--------------------------|
| CD133 | F                        | AGTGGCATCGTGCAAACCTG     |
|       | R                        | CTCCGAATCCATTCGACGATAGTA |
| Nanog | F                        | CTAAGAGGTGGCAGAAAAACA    |
|       | R                        | CTGGTGGTAGGAAGAGTAAAGG   |
| Sox2  | F                        | CATGTCCCAGCACTACCAGA     |
|       | R                        | GTCATTTGCTGTGGGTGATG     |
| Oct4  | F                        | GTACTCCTCGGTCCCTTTCC     |
|       | R                        | CAAAAACCCTGGCACAACCT     |
| c-Myc | F                        | GCCACGTCTCCACACATCAG     |
|       | R                        | TGGTGCATTTTCGGTTGTTG     |
| GAPDH | F                        | GGACCTGACCTGCCGTCTAGAA   |
|       | R                        | GGTGTGCTGTTGAAGTCAGAG    |
